# Supplementary material
Source: Springer Nature journal article supplement (https://www.springermedizin.de/resource/supplementary/12885_2007_869_MOESM8_ESM.pdf/9470540)

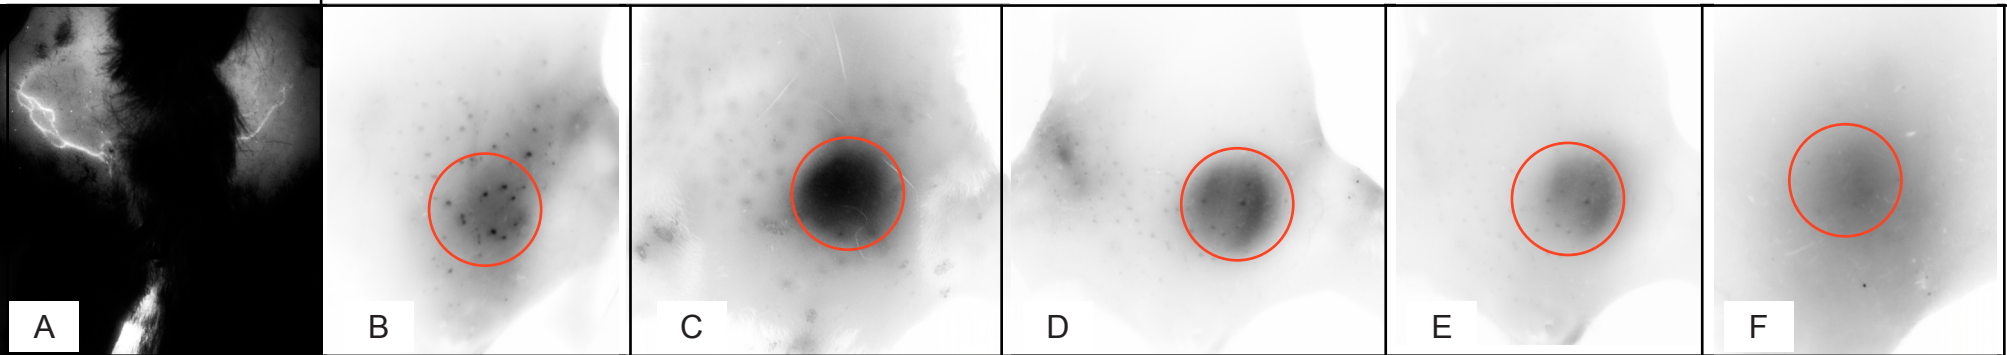

0 min      10 min      120 min      240 min      330 min      1440 min

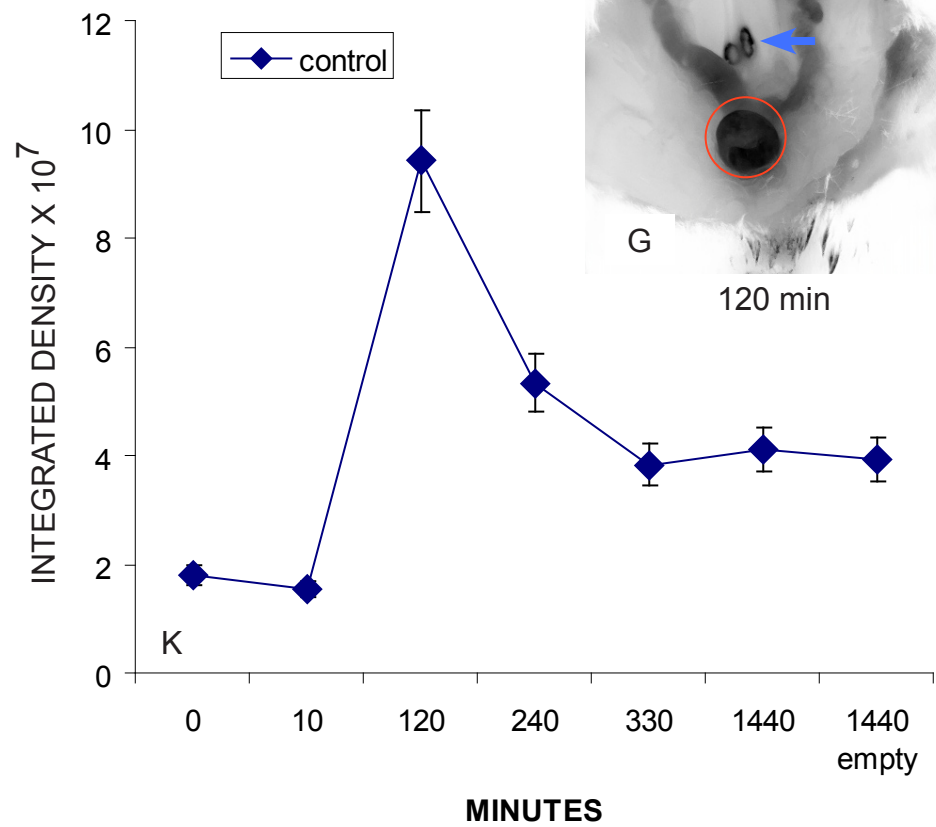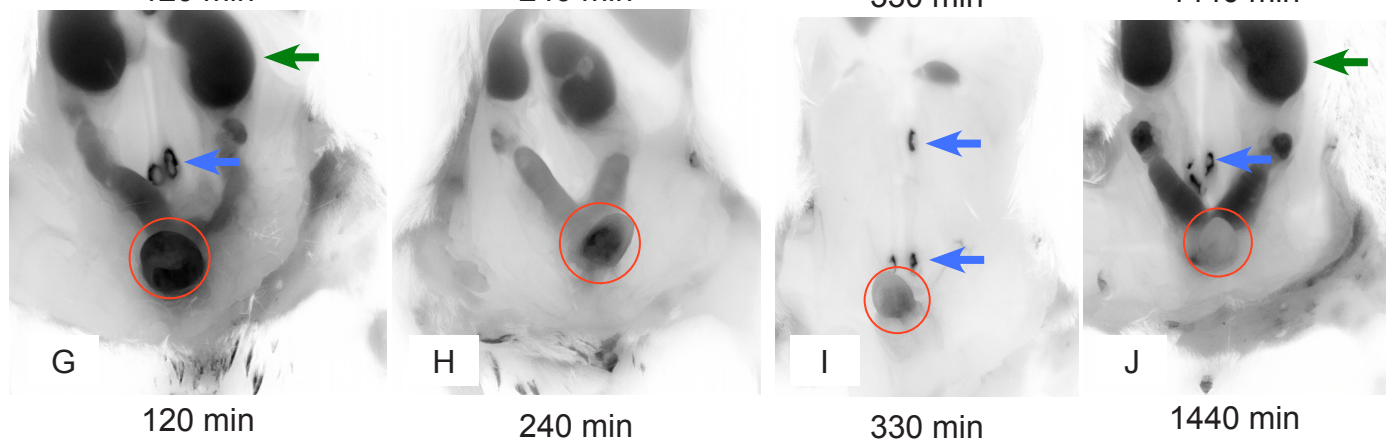

120 min      240 min      330 min      1440 min

Supplement: MOESM8 [file 9470540]
